# Supplementary material for: A Computational Approach for the Prediction of HIV Resistance Based on Amino Acid and Nucleotide Descriptors
Source: MDPI journal article supplement (doi:10.3390/molecules23112751), 2018-10-24
Supplement: s1 [file s1]

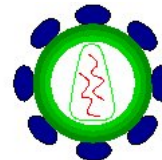

phenotype prediction from genotype (version 3.4)

## I. General information

|                  |                              |
|------------------|------------------------------|
| Patient:         | Study Id:                    |
| Birth date:      | Viral load:                  |
| Sample received: | Sample collected:            |
| Sample ID: 41    | Predicted subtype: B (100%)  |
| Sample type:     | Report date: October 6, 2018 |
| Physician:       | Reported by:                 |

## II. Substitutions (relative to the reference strain HXB2)

|                        |                                                                                           |
|------------------------|-------------------------------------------------------------------------------------------|
| Protease:              | V3I, I15V, K20R, V32I, M36I, S37N, M46I, I47I/V, F53L, I54V, L63P, A71I, V82A, L90M, I93L |
| Reverse transcriptase: |                                                                                           |

## III. Phenotype prediction

| Drug      | Resistance Factor RF (*) | z-score | Scored Positions (**)                                                                                |
|-----------|--------------------------|---------|------------------------------------------------------------------------------------------------------|
| ZDV       | 0                        | 0       |                                                                                                      |
| ddI       | 0                        | 0       |                                                                                                      |
| d4T       | 0                        | 0       |                                                                                                      |
| 3TC       | 0                        | 0       |                                                                                                      |
| ABC       | 0                        | 0       |                                                                                                      |
| TDF       | 0                        | 0       |                                                                                                      |
| NVP       | 0                        | 0       |                                                                                                      |
| EFV       | 0                        | 0       |                                                                                                      |
| ETR (***) | Susceptible              |         |                                                                                                      |
| RPV (***) | Susceptible              |         |                                                                                                      |
| SQV       | 49.335                   | 11.191  | 48G 73G 84I 11V 74T 88N <u>90M</u> 95C <u>53L</u> 26T 1P 80T 34E <u>47I</u> 97L                      |
| IDV       | 160.612                  | 13.204  | 88N <u>90M</u> 29D 1P 73G 21E 65E 84I <u>32I</u> <u>46I</u> 11V 85I 30D 78G 98N                      |
| NFV       | 113.362                  | 10.574  | 88N 30D <u>90M</u> <u>97L</u> 73G 68G <u>46I</u> <u>31T</u> 75V 74T 84I 5L 2Q 1P 29D                 |
| APV       | 44.229                   | 11.638  | 76L 50I 84I <u>32I</u> <u>46I</u> 85I <u>47V</u> 22A <u>63P</u> 1P 13I <u>90M</u> <u>97L</u> 45K 21E |
| LPV       | 111.761                  | 13.779  | 84I 50I <u>46I</u> <u>54V</u> 76L 10L 22A 7Q <u>63P</u> 24L <u>47V</u> 25D <u>82A</u> 92Q 2Q         |
| TPV       | 3.613                    | 2.76    | 69H <u>82A</u> <u>46I</u> 48G 84I 33L <u>90M</u> <u>47V</u> 72I 91T <u>15V</u> 74T 88N 58Q 19L       |
| DRV       | 4.122                    | 3.614   | <u>47V</u> 84I 33L 76L 74T 43K 73G 65E <u>93L</u> 48G <u>82A</u> <u>32I</u> 10L 7Q 8R                |
| ATV       | 111.108                  | 13.935  | 48G 73G 84I <u>90M</u> <u>82A</u> 4T 88N 7Q 24L 76L 45K <u>32I</u> <u>93L</u> <u>46I</u> 41R         |

(\*) based on LIBSVM, Copyright (c) 2000, Chih-Chung Chang and Chih-Jen Lin

(\*\*) Positions are ordered according to their impact on the phenotype prediction. Differences with respect to HXB2 are underlined. Positions shown in red and in green contribute to an increase or decrease in resistance, respectively. At most 15 positions are shown for each drug.

(\*\*\*) Resistance predictions and scored mutations for ETR and RPV were performed with rules-based drug-resistance interpretation models by HIV-GRADE (<http://www.hiv-grade.de>)

## IV. Interpretation

|                  |             |                |
|------------------|-------------|----------------|
| Patient:         | Birth date: | Sampling date: |
| Current therapy: | Viral load: |                |

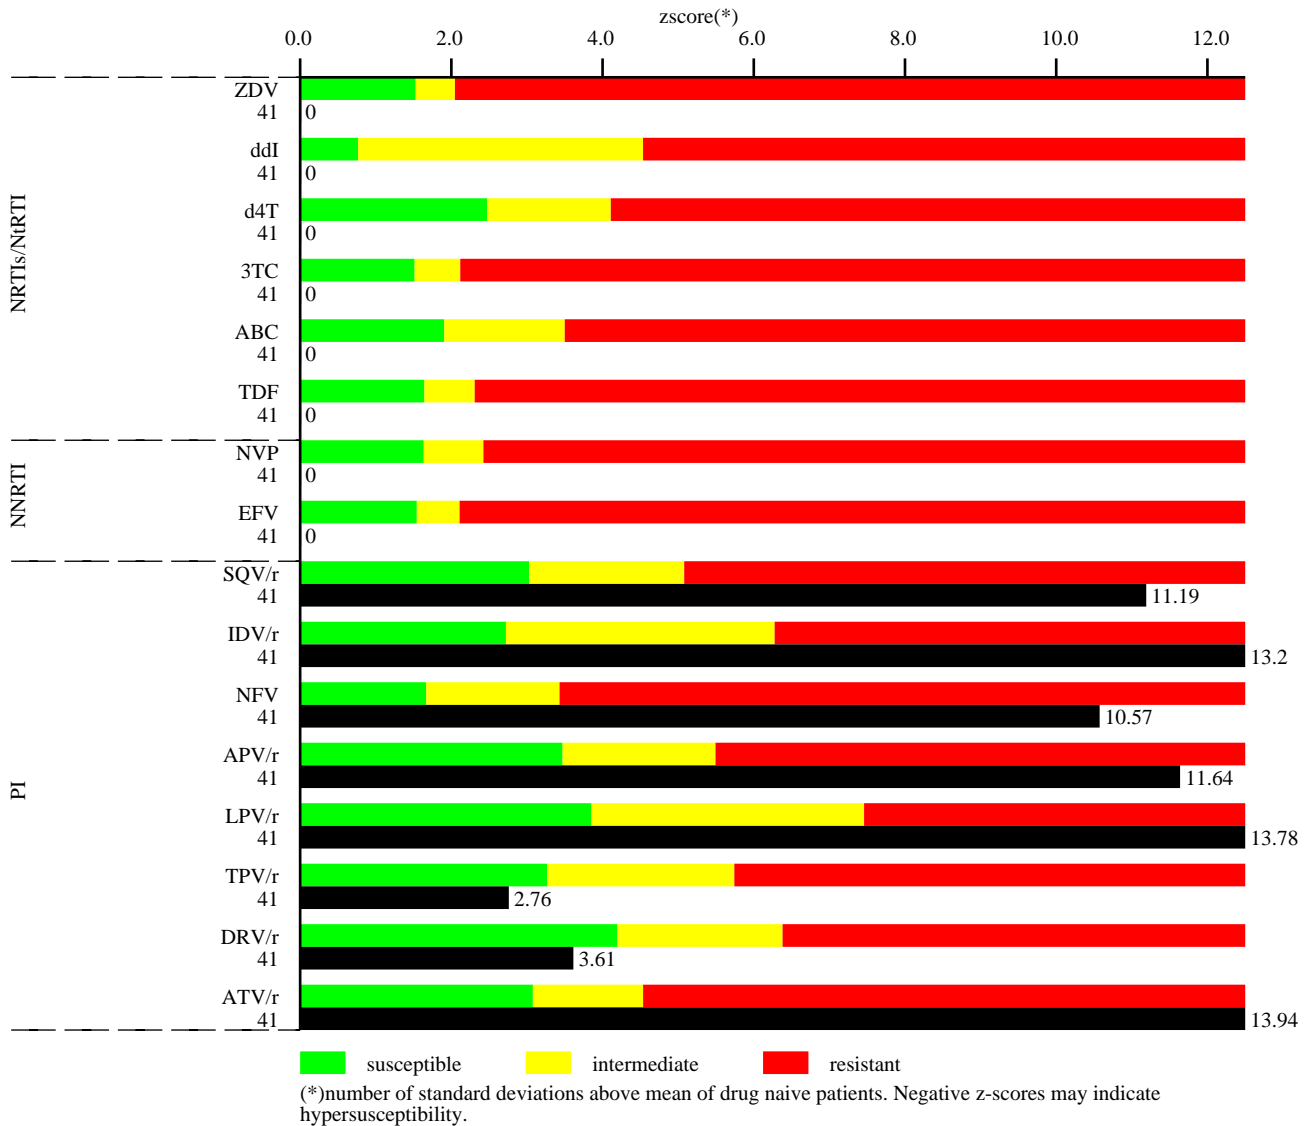

NRTIs/NtRTI:

NNRTIs:

PIs:

Previous genotypes:

date

signature
