# Supplementary material for: A Computational Approach for the Prediction of HIV Resistance Based on Amino Acid and Nucleotide Descriptors
Source: MDPI journal article supplement (doi:10.3390/molecules23112751), 2018-10-24
Supplement: s1 [file s1]

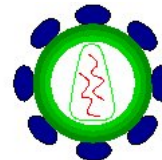

phenotype prediction from genotype (version 3.4)

## I. General information

|                  |                              |
|------------------|------------------------------|
| Patient:         | Study Id:                    |
| Birth date:      | Viral load:                  |
| Sample received: | Sample collected:            |
| Sample ID: 39    | Predicted subtype: B (100%)  |
| Sample type:     | Report date: October 6, 2018 |
| Physician:       | Reported by:                 |

## II. Substitutions (relative to the reference strain HXB2)

|                        |                                                                                                                       |
|------------------------|-----------------------------------------------------------------------------------------------------------------------|
| Protease:              | V3I, L10I, T12P, I15V, K20R, V32I/V, M36I, S37D, M46L, I54L, L63P, A71V, T74S/T, P79S, V82A/V, I84V, I85V, L90M, I93L |
| Reverse transcriptase: |                                                                                                                       |

## III. Phenotype prediction

| Drug      | Resistance Factor RF (*) | z-score | Scored Positions (**)                                                                                       |
|-----------|--------------------------|---------|-------------------------------------------------------------------------------------------------------------|
| ZDV       | 0                        | 0       |                                                                                                             |
| ddI       | 0                        | 0       |                                                                                                             |
| d4T       | 0                        | 0       |                                                                                                             |
| 3TC       | 0                        | 0       |                                                                                                             |
| ABC       | 0                        | 0       |                                                                                                             |
| TDF       | 0                        | 0       |                                                                                                             |
| NVP       | 0                        | 0       |                                                                                                             |
| EFV       | 0                        | 0       |                                                                                                             |
| ETR (***) | Susceptible              |         |                                                                                                             |
| RPV (***) | Susceptible              |         |                                                                                                             |
| SQV       | 113.167                  | 13.605  | 48G <u>84V</u> 73G 11V 88N <u>90M</u> 53F 95C 26T 1P 80T 34E <u>54L</u> 47I 97L                             |
| IDV       | 401.033                  | 15.679  | <u>54L</u> 88N <u>90M</u> 29D 1P <u>84V</u> 73G 21E 65E <u>32I</u> 11V <u>10I</u> 30D 78G 98N               |
| NFV       | 202.613                  | 11.942  | 88N 30D <u>90M</u> <u>84V</u> 97L 73G 68G 31T 75V <u>54L</u> 5L 2Q 1P 29D 48G                               |
| APV       | 198.8                    | 16.394  | 76L 50I <u>84V</u> <u>32I</u> <u>54L</u> <u>37D</u> 22A <u>63P</u> 1P 47I 13I <u>90M</u> 97L 45K <u>10I</u> |
| LPV       | 182.575                  | 15.2    | 50I <u>84V</u> 76L <u>54L</u> 22A 7Q <u>63P</u> 24L 25D <u>82A</u> 74S <u>37D</u> 47I 92Q 2Q                |
| TPV       | 13.891                   | 5.68    | 69H 48G <u>84V</u> 33L <u>90M</u> 47I 72I 91T <u>71V</u> 15V <u>54L</u> <u>82V</u> 74S 88N 58Q              |
| DRV       | 19.195                   | 7.753   | 47I <u>84V</u> 33L 76L 43K 73G <u>74S</u> <u>37D</u> 65E <u>93L</u> 48G <u>32I</u> <u>85V</u> 7Q 8R         |
| ATV       | 371.154                  | 17.667  | 48G 73G <u>84V</u> <u>90M</u> <u>82A</u> 4T <u>46L</u> 88N 7Q 24L 76L 45K <u>32I</u> <u>54L</u> <u>93L</u>  |

(\*) based on LIBSVM, Copyright (c) 2000, Chih-Chung Chang and Chih-Jen Lin

(\*\*) Positions are ordered according to their impact on the phenotype prediction. Differences with respect to HXB2 are underlined. Positions shown in red and in green contribute to an increase or decrease in resistance, respectively. At most 15 positions are shown for each drug.

(\*\*\*) Resistance predictions and scored mutations for ETR and RPV were performed with rules-based drug-resistance interpretation models by HIV-GRADE (<http://www.hiv-grade.de>)

## IV. Interpretation

|                  |             |                |
|------------------|-------------|----------------|
| Patient:         | Birth date: | Sampling date: |
| Current therapy: | Viral load: |                |

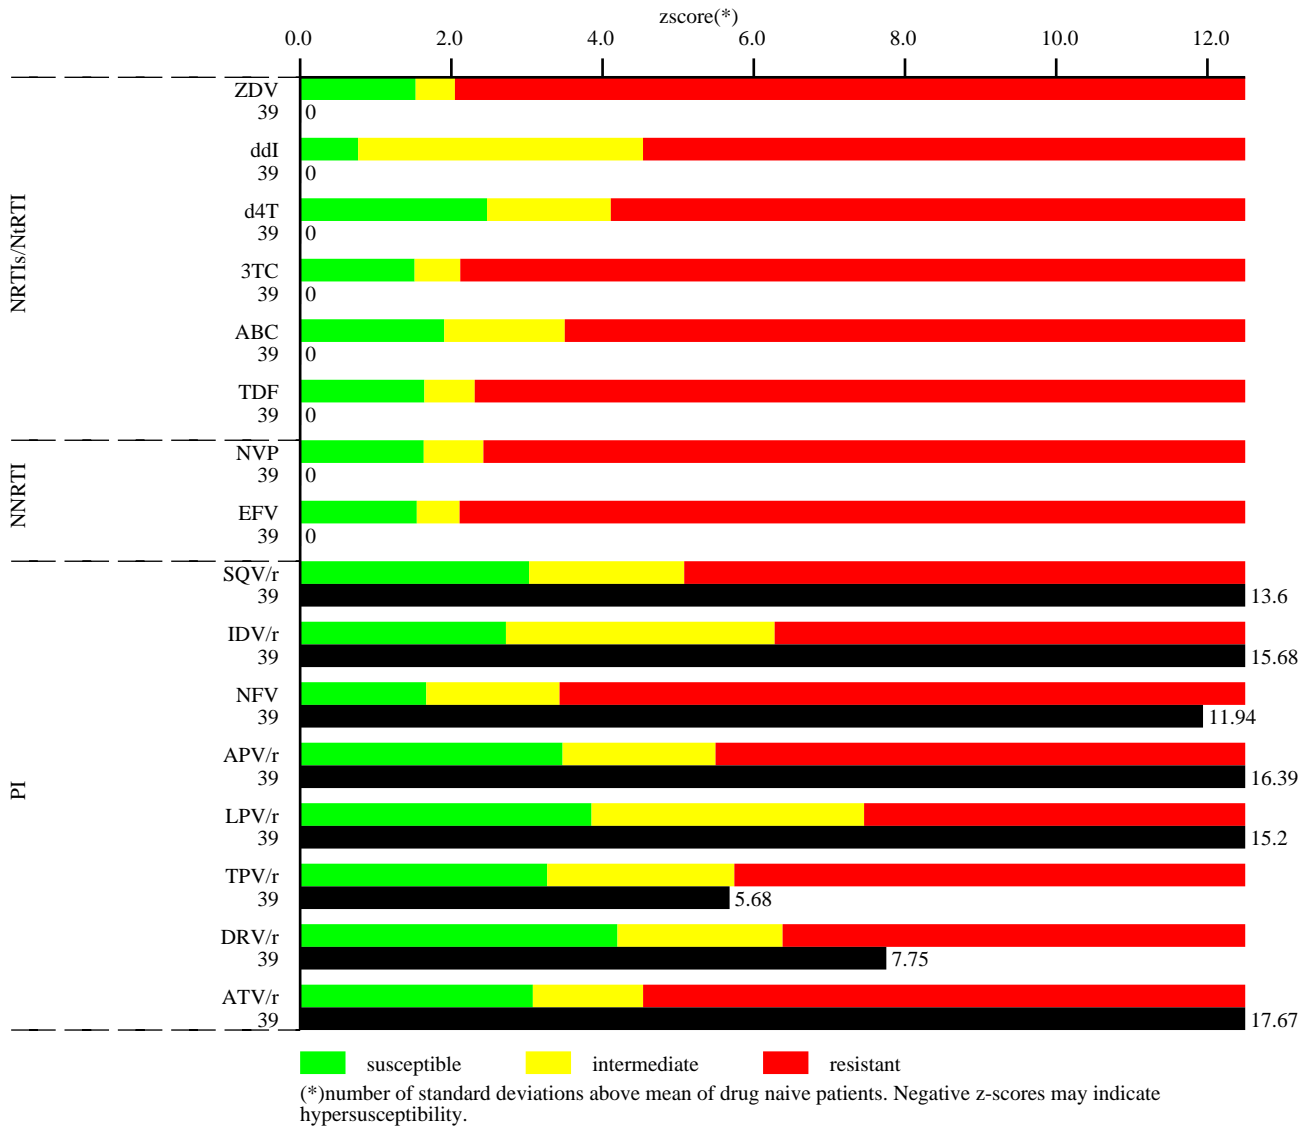

NRTIs/NtRTI:

NNRTIs:

PIs:

Previous genotypes:

date

signature
