# Supplementary material for: A Computational Approach for the Prediction of HIV Resistance Based on Amino Acid and Nucleotide Descriptors
Source: MDPI journal article supplement (doi:10.3390/molecules23112751), 2018-10-24
Supplement: s1 [file s1]

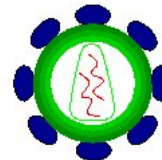

## phenotype prediction from genotype (version 3.4)

### I. General information

|                  |                              |
|------------------|------------------------------|
| Patient:         | Study Id:                    |
| Birth date:      | Viral load:                  |
| Sample received: | Sample collected:            |
| Sample ID: 13    | Predicted subtype: B (100%)  |
| Sample type:     | Report date: October 6, 2018 |
| Physician:       | Reported by:                 |

### II. Substitutions

(relative to the reference strain HXB2)

|                        |                                                                                                                               |
|------------------------|-------------------------------------------------------------------------------------------------------------------------------|
| Protease:              | V3I, L10I, K20R, L33F, E34T, E35D, M36I, S37D, K43T, M46I, G48V, I50V, I54S, I62V, L63P, A71I/V, I72V, V77I, V82A, I85V, I93L |
| Reverse transcriptase: |                                                                                                                               |

### III. Phenotype prediction

| Drug      | Resistance Factor RF (*) | z-score | Scored Positions (**)                                                                                       |
|-----------|--------------------------|---------|-------------------------------------------------------------------------------------------------------------|
| ZDV       | 0                        | 0       |                                                                                                             |
| ddI       | 0                        | 0       |                                                                                                             |
| d4T       | 0                        | 0       |                                                                                                             |
| 3TC       | 0                        | 0       |                                                                                                             |
| ABC       | 0                        | 0       |                                                                                                             |
| TDF       | 0                        | 0       |                                                                                                             |
| NVP       | 0                        | 0       |                                                                                                             |
| EFV       | 0                        | 0       |                                                                                                             |
| ETR (***) | Susceptible              |         |                                                                                                             |
| RPV (***) | Susceptible              |         |                                                                                                             |
| SQV       | 177.825                  | 14.919  | <u>48V</u> 73G 90L 84I 11V 74T 88N 53F 95C 26T 1P 80T 47I 97L 24L                                           |
| IDV       | 649.319                  | 16.983  | 88N 29D 1P <u>48V</u> 73G 21E 65E 84I <u>46I</u> 11V <u>10I</u> 30D <u>54S</u> 90L 78G                      |
| NFV       | 136.899                  | 11.019  | 88N 30D <u>97L</u> 73G 68G 90L <u>46I</u> 31T 75V 74T 84I 5L 2Q <u>54S</u> 1P                               |
| APV       | 227.363                  | 16.819  | <u>33F</u> 76L <u>50V</u> 84I 32V <u>46I</u> <u>37D</u> <u>48V</u> 22A <u>43T</u> <u>63P</u> 1P 47I 13I 97L |
| LPV       | 409.877                  | 17.541  | 84I <u>50V</u> <u>46I</u> <u>33F</u> <u>48V</u> 76L 22A 7Q <u>63P</u> 24L 25D <u>82A</u> <u>37D</u> 47I 92Q |
| TPV       | 1.677                    | 1.096   | <u>69H</u> <u>82A</u> <u>46I</u> 84I 47I 15I 91T <u>71V</u> 90L 74T 88N 58Q 19L 13I <u>37D</u>              |
| DRV       | 20.461                   | 7.925   | 47I <u>33F</u> 84I 76L 74T 73G <u>37D</u> <u>65E</u> <u>43T</u> 93L <u>82A</u> <u>85V</u> 15I 7Q <u>62V</u> |
| ATV       | 222.779                  | 16.087  | 73G 84I <u>82A</u> 4T <u>33F</u> <u>48V</u> 88N 90L 7Q 24L 76L 45K 32V <u>93L</u> <u>46I</u>                |

(\*) based on LIBSVM, Copyright (c) 2000, Chih-Chung Chang and Chih-Jen Lin

(\*\*) Positions are ordered according to their impact on the phenotype prediction. Differences with respect to HXB2 are underlined. Positions shown in red and in green contribute to an increase or decrease in resistance, respectively. At most 15 positions are shown for each drug.

(\*\*\*) Resistance predictions and scored mutations for ETR and RPV were performed with rules-based drug-resistance interpretation models by HIV-GRADE (<http://www.hiv-grade.de>)

## IV. Interpretation

|                  |             |                |
|------------------|-------------|----------------|
| Patient:         | Birth date: | Sampling date: |
| Current therapy: | Viral load: |                |

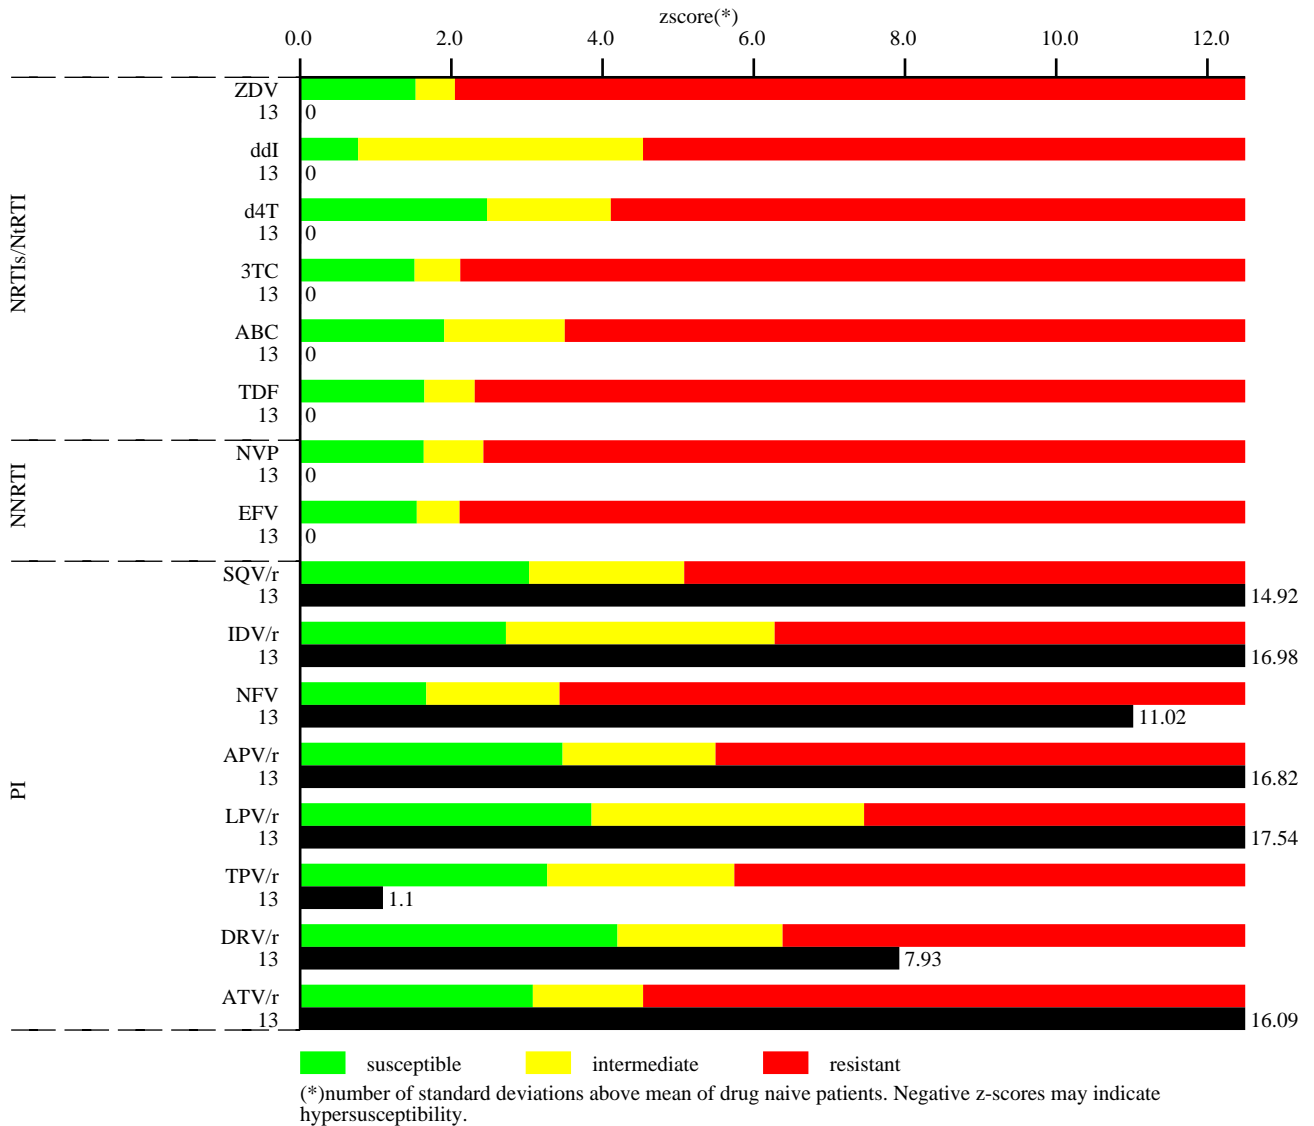

NRTIs/NtRTI:

NNRTIs:

PIs:

Previous genotypes:

date

signature
