# Supplementary material for: A Computational Approach for the Prediction of HIV Resistance Based on Amino Acid and Nucleotide Descriptors
Source: MDPI journal article supplement (doi:10.3390/molecules23112751), 2018-10-24
Supplement: s1 [file s1]

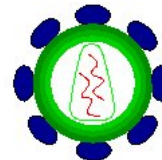

phenotype prediction from genotype (version 3.4)

## I. General information

|                  |                              |
|------------------|------------------------------|
| Patient:         | Study Id:                    |
| Birth date:      | Viral load:                  |
| Sample received: | Sample collected:            |
| Sample ID: 37    | Predicted subtype: B (100%)  |
| Sample type:     | Report date: October 6, 2018 |
| Physician:       | Reported by:                 |

## II. Substitutions

(relative to the reference strain HXB2)

|                        |                                                                                                                                                   |
|------------------------|---------------------------------------------------------------------------------------------------------------------------------------------------|
| Protease:              | V3I, L10I, I13V, K20R, L33F, E35D, M36I, S37E, K43T, M46I, I54V, R57K, D60E, Q61E, I62V, L63P, I64I/V, G68E, A71T, I72T, G73A/T, V82F, L90M, I93L |
| Reverse transcriptase: |                                                                                                                                                   |

## III. Phenotype prediction

| Drug      | Resistance Factor RF (*) | z-score | Scored Positions (**)                                       |
|-----------|--------------------------|---------|-------------------------------------------------------------|
| ZDV       | 0                        | 0       |                                                             |
| ddI       | 0                        | 0       |                                                             |
| d4T       | 0                        | 0       |                                                             |
| 3TC       | 0                        | 0       |                                                             |
| ABC       | 0                        | 0       |                                                             |
| TDF       | 0                        | 0       |                                                             |
| NVP       | 0                        | 0       |                                                             |
| EFV       | 0                        | 0       |                                                             |
| ETR (***) | Susceptible              |         |                                                             |
| RPV (***) | Susceptible              |         |                                                             |
| SQV       | 38.405                   | 10.463  | 48G 84I 11V 74T 88N 82F 90M 53F 95C 26T 1P 73T 80T 34E 47I  |
| IDV       | 278.271                  | 14.691  | 88N 82F 90M 29D 1P 71T 21E 65E 84I 46L 73T 11V 10I 85I 30D  |
| NFV       | 241.62                   | 12.357  | 88N 30D 90M 97L 82F 46L 31T 75V 74T 84I 5L 2Q 1P 29D 48G    |
| APV       | 107.509                  | 14.449  | 33F 76L 50I 84I 82F 32V 46L 85I 22A 43T 63P 1P 47I 90M 97L  |
| LPV       | 132.417                  | 14.27   | 84I 50I 46L 54V 33F 76L 82F 22A 7Q 63P 24L 25D 47I 92Q 2Q   |
| TPV       | 10.361                   | 5.044   | 69H 46L 48G 84I 90M 47I 15I 91T 74T 88N 58Q 19L 39P 89L 41R |
| DRV       | 21.84                    | 8.101   | 47I 33F 84I 76L 74T 65E 43T 93L 48G 72T 15I 7Q 62V 8R 16G   |
| ATV       | 109.959                  | 13.903  | 48G 84I 90M 73T 71T 4T 33F 88N 7Q 24L 76L 45K 32V 93L 46L   |

(\*) based on LIBSVM, Copyright (c) 2000, Chih-Chung Chang and Chih-Jen Lin

(\*\*) Positions are ordered according to their impact on the phenotype prediction. Differences with respect to HXB2 are underlined. Positions shown in red and in green contribute to an increase or decrease in resistance, respectively. At most 15 positions are shown for each drug.

(\*\*\*) Resistance predictions and scored mutations for ETR and RPV were performed with rules-based drug-resistance interpretation models by HIV-GRADE (<http://www.hiv-grade.de>)

## IV. Interpretation

|                  |             |                |
|------------------|-------------|----------------|
| Patient:         | Birth date: | Sampling date: |
| Current therapy: | Viral load: |                |

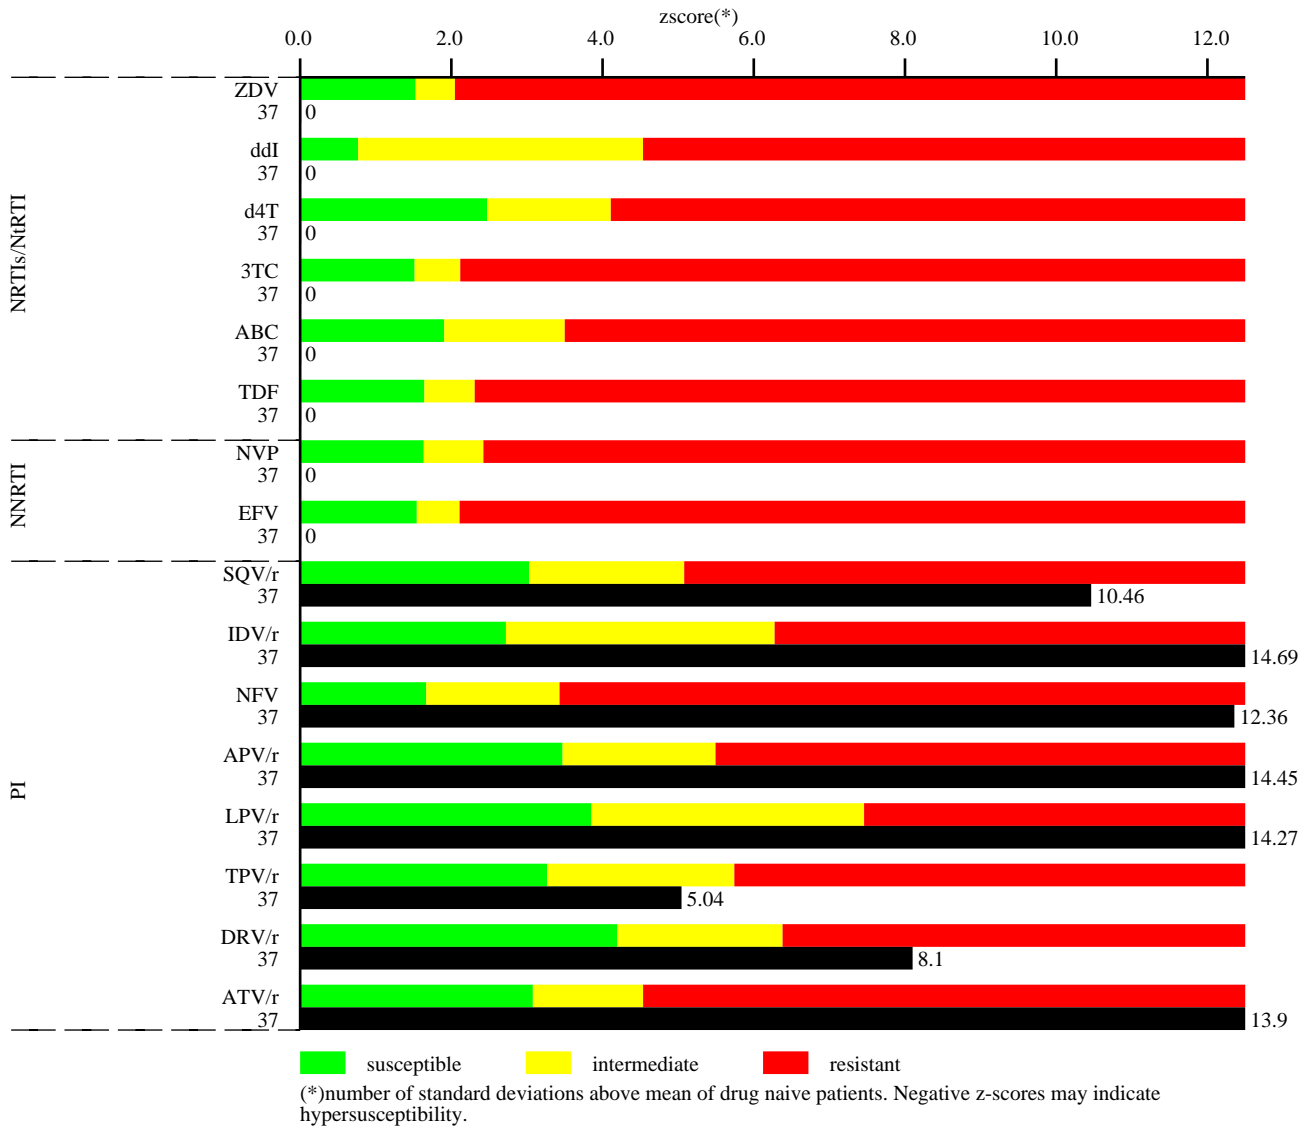

NRTIs/NtRTI:

NNRTIs:

PIs:

Previous genotypes:

date

signature
