# Supplementary material for: A Computational Approach for the Prediction of HIV Resistance Based on Amino Acid and Nucleotide Descriptors
Source: MDPI journal article supplement (doi:10.3390/molecules23112751), 2018-10-24
Supplement: s1 [file s1]

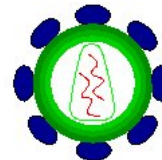

## phenotype prediction from genotype (version 3.4)

### I. General information

|                  |                              |
|------------------|------------------------------|
| Patient:         | Study Id:                    |
| Birth date:      | Viral load:                  |
| Sample received: | Sample collected:            |
| Sample ID: 30    | Predicted subtype: B (100%)  |
| Sample type:     | Report date: October 6, 2018 |
| Physician:       | Reported by:                 |

### II. Substitutions (relative to the reference strain HXB2)

|                        |                                                                                                             |
|------------------------|-------------------------------------------------------------------------------------------------------------|
| Protease:              | V3I, L10F, I13V, D30N, L33F, S37N, K45R, I54L, L63P, I66I/V, P79P/S, I84V, N88D, L89F/L, L90M, I93L, C95C/F |
| Reverse transcriptase: |                                                                                                             |

### III. Phenotype prediction

| Drug      | Resistance Factor RF (*) | z-score | Scored Positions (**)                                                                                |
|-----------|--------------------------|---------|------------------------------------------------------------------------------------------------------|
| ZDV       | 0                        | 0       |                                                                                                      |
| ddI       | 0                        | 0       |                                                                                                      |
| d4T       | 0                        | 0       |                                                                                                      |
| 3TC       | 0                        | 0       |                                                                                                      |
| ABC       | 0                        | 0       |                                                                                                      |
| TDF       | 0                        | 0       |                                                                                                      |
| NVP       | 0                        | 0       |                                                                                                      |
| EFV       | 0                        | 0       |                                                                                                      |
| ETR (***) | Susceptible              |         |                                                                                                      |
| RPV (***) | Susceptible              |         |                                                                                                      |
| SQV       | 98.63                    | 13.205  | 48G <u>84V</u> 73G 11V 74T <u>88D</u> <u>90M</u> 53F 26T 1P 71A 80T 34E <u>30N</u> <u>54L</u>        |
| IDV       | 26.999                   | 8.38    | 82V <u>54L</u> 46M <u>90M</u> 29D 1P <u>84V</u> 73G 21E 65E 11V 71A 85I 78G 98N                      |
| NFV       | 357.229                  | 13.277  | <u>30N</u> <u>90M</u> 46M <u>84V</u> 82V 97L 20K 73G 68G <u>88D</u> 71A 36M 31T 75V 74T              |
| APV       | 69.706                   | 13.078  | <u>33F</u> 76L 50I <u>84V</u> 46M 32V <u>54L</u> 85I <u>10F</u> 22A <u>63P</u> 1P 47I 82V <u>90M</u> |
| LPV       | 14.349                   | 7.837   | 82V 46M 50I <u>84V</u> <u>33F</u> 76L <u>54L</u> 22A 71A <u>10F</u> 7Q <u>63P</u> 24L 20K 25D        |
| TPV       | 3.152                    | 2.464   | 69H 48G <u>84V</u> <u>90M</u> 47I 71A 72I 15I 91T 20K <u>54L</u> 82V 74T 46M 58Q                     |
| DRV       | 5.896                    | 4.577   | 47I <u>33F</u> <u>84V</u> 76L 74T 43K 73G 46M 71A 36M 65E <u>10F</u> <u>93L</u> 48G 15I              |
| ATV       | 39.085                   | 10.703  | 48G 73G <u>84V</u> 82V <u>90M</u> 4T <u>33F</u> 71A 7Q 46M 36M 20K 24L <u>76L</u> 32V                |

(\*) based on LIBSVM, Copyright (c) 2000, Chih-Chung Chang and Chih-Jen Lin

(\*\*) Positions are ordered according to their impact on the phenotype prediction. Differences with respect to HXB2 are underlined. Positions shown in red and in green contribute to an increase or decrease in resistance, respectively. At most 15 positions are shown for each drug.

(\*\*\*) Resistance predictions and scored mutations for ETR and RPV were performed with rules-based drug-resistance interpretation models by HIV-GRADE (<http://www.hiv-grade.de>)

## IV. Interpretation

|                  |             |                |
|------------------|-------------|----------------|
| Patient:         | Birth date: | Sampling date: |
| Current therapy: | Viral load: |                |

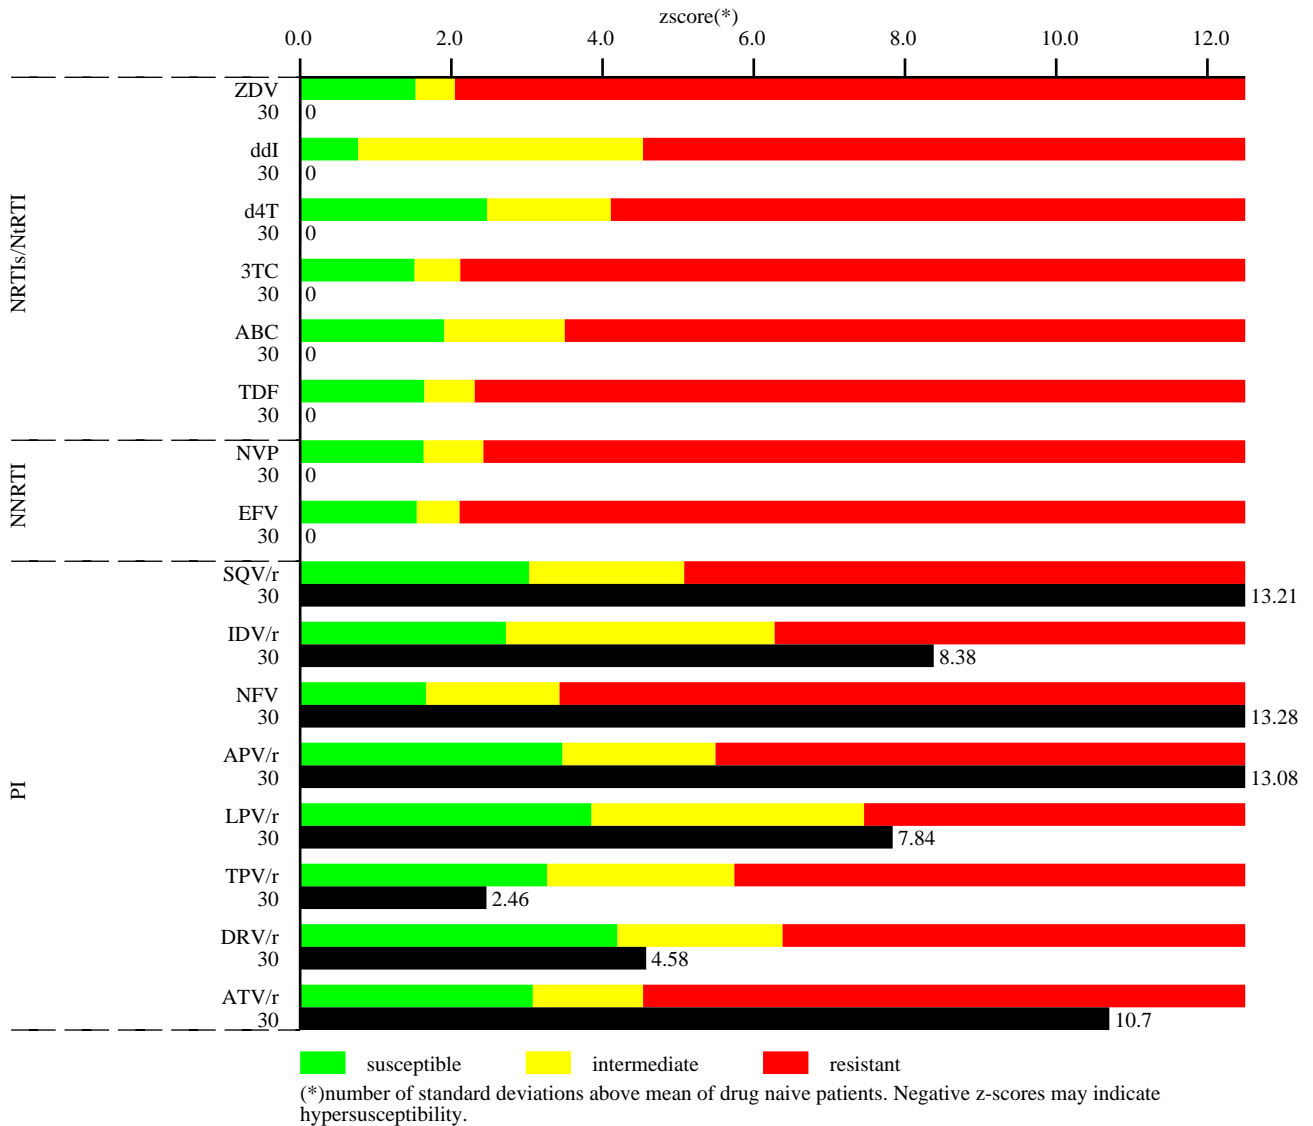

NRTIs/NtRTI:

NNRTIs:

PIs:

Previous genotypes:

date

signature
