# Supplementary material for: A Computational Approach for the Prediction of HIV Resistance Based on Amino Acid and Nucleotide Descriptors
Source: MDPI journal article supplement (doi:10.3390/molecules23112751), 2018-10-24
Supplement: s1 [file s1]

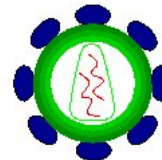

## I. General information

|                  |                                  |
|------------------|----------------------------------|
| Patient:         | Study Id:                        |
| Birth date:      | Viral load:                      |
| Sample received: | Sample collected:                |
| Sample ID: 24    | Predicted subtype: 06_CPX (100%) |
| Sample type:     | Report date: October 6, 2018     |
| Physician:       | Reported by:                     |

## II. Substitutions

(relative to the reference strain HXB2)

|                        |                                                                                                                       |
|------------------------|-----------------------------------------------------------------------------------------------------------------------|
| Protease:              | V3I, L10F, V11I, T12P, I13V, I15V, L19P, K20I, E35G, M36I, S37N, M46I, I54V, L63P, A71V, I72L, G73S, I84V, L90M, I93L |
| Reverse transcriptase: |                                                                                                                       |

## III. Phenotype prediction

| Drug      | Resistance Factor RF (*) | z-score | Scored Positions (**)                                                                                 |
|-----------|--------------------------|---------|-------------------------------------------------------------------------------------------------------|
| ZDV       | 0                        | 0       |                                                                                                       |
| ddI       | 0                        | 0       |                                                                                                       |
| d4T       | 0                        | 0       |                                                                                                       |
| 3TC       | 0                        | 0       |                                                                                                       |
| ABC       | 0                        | 0       |                                                                                                       |
| TDF       | 0                        | 0       |                                                                                                       |
| NVP       | 0                        | 0       |                                                                                                       |
| EFV       | 0                        | 0       |                                                                                                       |
| ETR (***) | Susceptible              |         |                                                                                                       |
| RPV (***) | Susceptible              |         |                                                                                                       |
| SQV       | 173.461                  | 14.847  | 48G <u>84V</u> 74T 88N <u>90M</u> 53F 95C 26T <u>11I</u> 1P 80T <u>35G</u> 34E <u>72L</u> 47I         |
| IDV       | 199.52                   | 13.791  | 82V 88N <u>90M</u> 29D 1P <u>84V</u> 21E 65E <u>46I</u> <u>72L</u> 85I 30D <u>73S</u> 78G 98N         |
| NFV       | 291.072                  | 12.795  | 88N 30D <u>90M</u> <u>84V</u> 82V 97L 68G <u>46I</u> 31T 75V 74T <u>5L</u> 2Q 1P 29D                  |
| APV       | 68.235                   | 13.01   | 76L 50I <u>84V</u> 32V <u>46I</u> 85I <u>10F</u> 22A <u>63P</u> 1P 47I 82V <u>90M</u> 97L 45K         |
| LPV       | 95.561                   | 13.326  | 82V 50I <u>46I</u> <u>54V</u> <u>84V</u> 76L 22A <u>10F</u> 7Q <u>63P</u> 24L 25D 47I 92Q 2Q          |
| TPV       | 18.552                   | 6.307   | 69H <u>46I</u> <u>48G</u> <u>84V</u> 33L <u>90M</u> 47I 91T <u>71V</u> 15V <u>73S</u> 82V 74T 88N 58Q |
| DRV       | 9.735                    | 5.926   | 47I <u>84V</u> 33L 76L 74T 43K 65E <u>10F</u> <u>93L</u> 48G 7Q 8R 16G 2Q 32V                         |
| ATV       | 239.788                  | 16.315  | 48G <u>84V</u> 82V <u>90M</u> 4T <u>72L</u> 88N <u>35G</u> 7Q <u>73S</u> 24L 76L 45K <u>19P</u> 32V   |

(\*) based on LIBSVM, Copyright (c) 2000, Chih-Chung Chang and Chih-Jen Lin

(\*\*) Positions are ordered according to their impact on the phenotype prediction. Differences with respect to HXB2 are underlined. Positions shown in red and in green contribute to an increase or decrease in resistance, respectively. At most 15 positions are shown for each drug.

(\*\*\*) Resistance predictions and scored mutations for ETR and RPV were performed with rules-based drug-resistance interpretation models by HIV-GRADE (<http://www.hiv-grade.de>)

## IV. Interpretation

|                  |             |                |
|------------------|-------------|----------------|
| Patient:         | Birth date: | Sampling date: |
| Current therapy: | Viral load: |                |

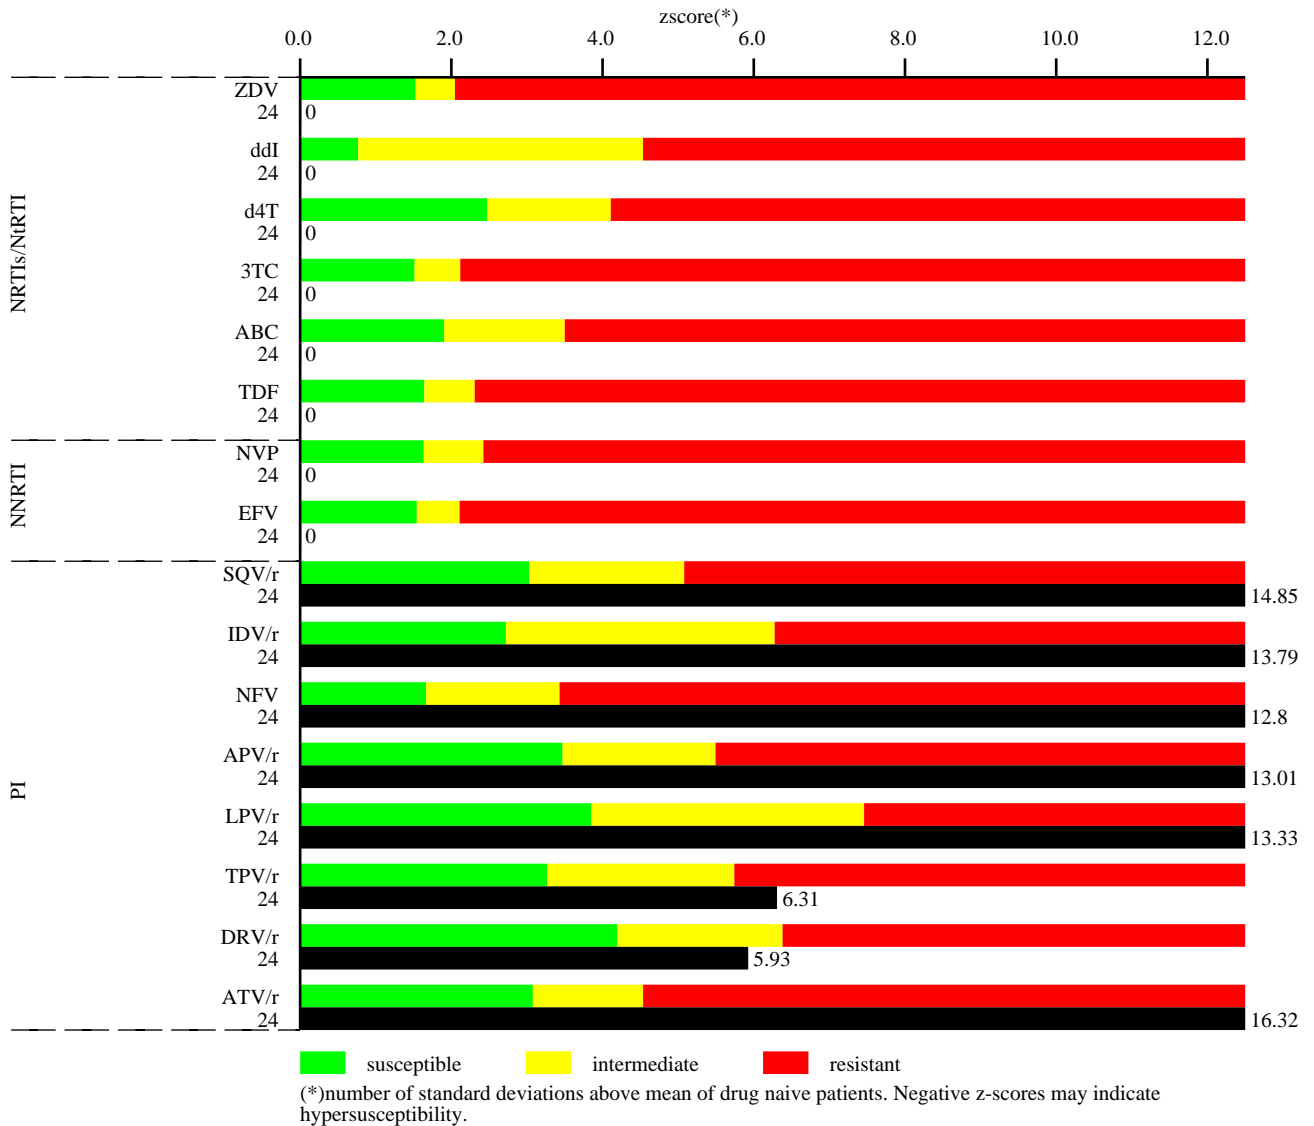

NRTIs/NtRTI:

NNRTIs:

PIs:

Previous genotypes:

date

signature
