# Supplementary material for: A Computational Approach for the Prediction of HIV Resistance Based on Amino Acid and Nucleotide Descriptors
Source: MDPI journal article supplement (doi:10.3390/molecules23112751), 2018-10-24
Supplement: s1 [file s1]

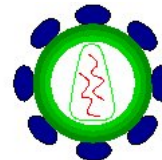

phenotype prediction from genotype (version 3.4)

## I. General information

|                  |                              |
|------------------|------------------------------|
| Patient:         | Study Id:                    |
| Birth date:      | Viral load:                  |
| Sample received: | Sample collected:            |
| Sample ID: 34    | Predicted subtype: B (100%)  |
| Sample type:     | Report date: October 6, 2018 |
| Physician:       | Reported by:                 |

## II. Substitutions (relative to the reference strain HXB2)

|                        |                                                                                                     |
|------------------------|-----------------------------------------------------------------------------------------------------|
| Protease:              | V3I, L10I, I15V, L23I, S37N, M46L, F53L, I54V, I62V, L63V, H69R, A71V, I72K, L76V, V82A, L89M, I93L |
| Reverse transcriptase: |                                                                                                     |

## III. Phenotype prediction

| Drug      | Resistance Factor RF (*) | z-score | Scored Positions (**)                                                                                              |
|-----------|--------------------------|---------|--------------------------------------------------------------------------------------------------------------------|
| ZDV       | 0                        | 0       |                                                                                                                    |
| ddI       | 0                        | 0       |                                                                                                                    |
| d4T       | 0                        | 0       |                                                                                                                    |
| 3TC       | 0                        | 0       |                                                                                                                    |
| ABC       | 0                        | 0       |                                                                                                                    |
| TDF       | 0                        | 0       |                                                                                                                    |
| NVP       | 0                        | 0       |                                                                                                                    |
| EFV       | 0                        | 0       |                                                                                                                    |
| ETR (***) | Susceptible              |         |                                                                                                                    |
| RPV (***) | Susceptible              |         |                                                                                                                    |
| SQV       | 5.227                    | 4.663   | 48G 73G 90L 84I 11V 74T 88N 95C <u>53L</u> 26T 1P 80T 34E <u>63V</u> 47I                                           |
| IDV       | 40.03                    | 9.446   | 88N <u>76V</u> 29D 1P 73G 21E <u>65E</u> 84I 11V <u>10I</u> 85I 30D 90L <u>89M</u> 78G                             |
| NFV       | 9.95                     | 4.845   | 88N 30D <u>97L</u> 20K 73G <u>68G</u> 90L 36M <u>31T</u> 75V 74T 84I <u>5L</u> <u>89M</u> 2Q                       |
| APV       | 31.189                   | 10.533  | <u>76V</u> 50I 84I 32V 85I <u>22A</u> 1P 47I 13I <u>89M</u> <u>97L</u> 45K <u>10I</u> <u>46L</u> 21E               |
| LPV       | 41.502                   | 10.911  | 84I 50I <u>54V</u> <u>76V</u> <u>22A</u> <u>7Q</u> 24L 20K 25D <u>82A</u> 47I 92Q 90L <u>2Q</u> 48G                |
| TPV       | 0.665                    | -0.91   | <u>82A</u> <u>48G</u> 84I 33L 47I <u>89M</u> <u>91T</u> <u>71V</u> 20K <u>15V</u> 90L 74T <u>88N</u> 58Q 19L       |
| DRV       | 3.519                    | 3.188   | 47I 84I 33L 74T 43K 73G <u>76V</u> 36M <u>65E</u> <u>93L</u> <u>89M</u> <u>48G</u> <u>82A</u> <u>7Q</u> <u>62V</u> |
| ATV       | 14.061                   | 7.54    | 48G 73G 84I <u>82A</u> 4T <u>46L</u> <u>76V</u> 88N 90L <u>7Q</u> 36M 20K 24L 45K 32V                              |

(\*) based on LIBSVM, Copyright (c) 2000, Chih-Chung Chang and Chih-Jen Lin

(\*\*) Positions are ordered according to their impact on the phenotype prediction. Differences with respect to HXB2 are underlined. Positions shown in red and in green contribute to an increase or decrease in resistance, respectively. At most 15 positions are shown for each drug.

(\*\*\*) Resistance predictions and scored mutations for ETR and RPV were performed with rules-based drug-resistance interpretation models by HIV-GRADE (<http://www.hiv-grade.de>)

## IV. Interpretation

|                  |             |                |
|------------------|-------------|----------------|
| Patient:         | Birth date: | Sampling date: |
| Current therapy: | Viral load: |                |

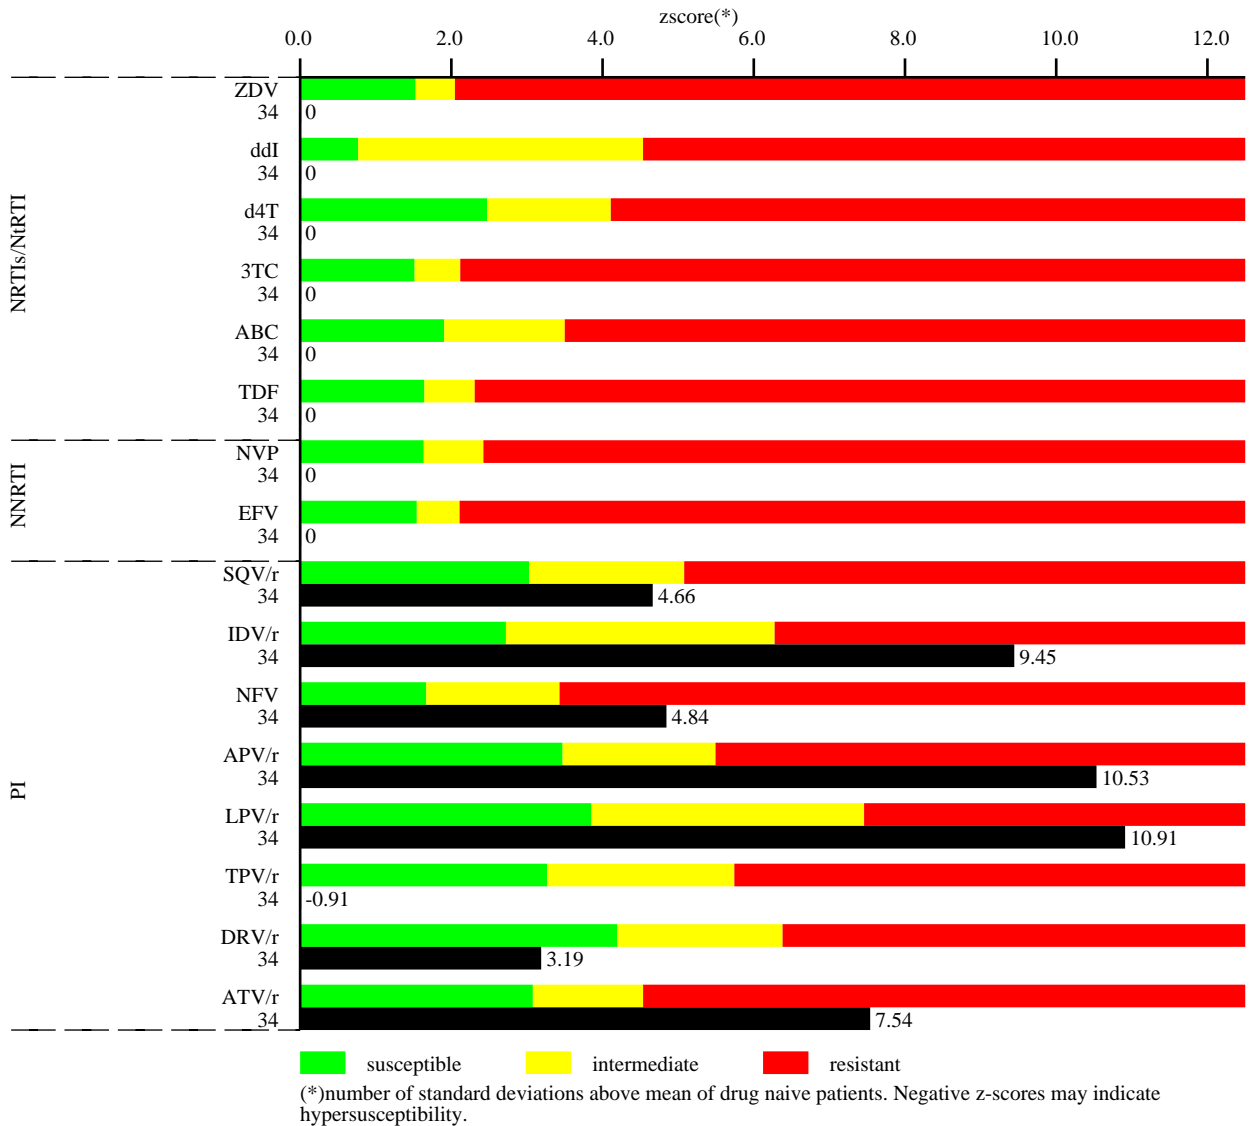

NRTIs/NtRTI:

NNRTIs:

PIs:

Previous genotypes:

date

signature
