# Supplementary material for: A Computational Approach for the Prediction of HIV Resistance Based on Amino Acid and Nucleotide Descriptors
Source: MDPI journal article supplement (doi:10.3390/molecules23112751), 2018-10-24
Supplement: s1 [file s1]

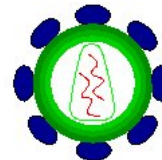

## phenotype prediction from genotype (version 3.4)

### I. General information

|                  |                              |
|------------------|------------------------------|
| Patient:         | Study Id:                    |
| Birth date:      | Viral load:                  |
| Sample received: | Sample collected:            |
| Sample ID: 45    | Predicted subtype: B (100%)  |
| Sample type:     | Report date: October 6, 2018 |
| Physician:       | Reported by:                 |

### II. Substitutions (relative to the reference strain HXB2)

|                        |                                                                                                                                                       |
|------------------------|-------------------------------------------------------------------------------------------------------------------------------------------------------|
| Protease:              | V3I, L10F, V11I, I13I/V, K20R, V32I, L33F, E35D, M36I, S37Q, M46I, I47V, I54L, R57K, Q58E, D60E, I62V, L63P, A71V, G73S, V77T, I84V, L89V, L90M, I93L |
| Reverse transcriptase: |                                                                                                                                                       |

### III. Phenotype prediction

| Drug      | Resistance Factor RF (*) | z-score | Scored Positions (**)                                                                                               |
|-----------|--------------------------|---------|---------------------------------------------------------------------------------------------------------------------|
| ZDV       | 0                        | 0       |                                                                                                                     |
| ddI       | 0                        | 0       |                                                                                                                     |
| d4T       | 0                        | 0       |                                                                                                                     |
| 3TC       | 0                        | 0       |                                                                                                                     |
| ABC       | 0                        | 0       |                                                                                                                     |
| TDF       | 0                        | 0       |                                                                                                                     |
| NVP       | 0                        | 0       |                                                                                                                     |
| EFV       | 0                        | 0       |                                                                                                                     |
| ETR (***) | Susceptible              |         |                                                                                                                     |
| RPV (***) | Susceptible              |         |                                                                                                                     |
| SQV       | 64.598                   | 11.975  | 48G <u>84V</u> 74T 88N <u>90M</u> 47V 53F 95C 26T <u>11I</u> 1P 80T 34E <u>54L</u> 97L                              |
| IDV       | 112.897                  | 12.25   | 82V <u>54L</u> 88N <u>90M</u> 29D 1P <u>84V</u> 21E 65E <u>32I</u> <u>46I</u> 85I 30D <u>73S</u> 78G                |
| NFV       | 315.989                  | 12.988  | 88N 30D <u>90M</u> <u>84V</u> 82V 97L 68G <u>46I</u> 31T 75V 74T <u>54L</u> 5L 2Q 1P                                |
| APV       | 1003.993                 | 21.519  | <u>33F</u> 76L 50I <u>84V</u> <u>32I</u> 89V <u>46I</u> <u>54L</u> 85I <u>47V</u> 10F 22A <u>63P</u> 1P 82V         |
| LPV       | 212.611                  | 15.641  | 82V 50I <u>46I</u> <u>84V</u> <u>33F</u> 76L <u>54L</u> 89V 22A <u>10F</u> 7Q <u>63P</u> 24L <u>47V</u> 25D         |
| TPV       | 10.052                   | 4.979   | 69H <u>46I</u> <u>48G</u> <u>84V</u> <u>90M</u> <u>47V</u> 72I 15I 91T <u>71V</u> <u>54L</u> <u>73S</u> 82V 74T 88N |
| DRV       | 127.737                  | 12.854  | <u>47V</u> <u>33F</u> <u>84V</u> 76L 74T 43K 65E <u>10F</u> <u>93L</u> <u>48G</u> <u>32I</u> 15I 7Q <u>62V</u> 8R   |
| ATV       | 311.536                  | 17.125  | 48G <u>84V</u> 82V <u>90M</u> 4T <u>33F</u> 88N 7Q <u>73S</u> 24L 76L 45K <u>32I</u> <u>54L</u> <u>93L</u>          |

(\*) based on LIBSVM, Copyright (c) 2000, Chih-Chung Chang and Chih-Jen Lin

(\*\*) Positions are ordered according to their impact on the phenotype prediction. Differences with respect to HXB2 are underlined. Positions shown in red and in green contribute to an increase or decrease in resistance, respectively. At most 15 positions are shown for each drug.

(\*\*\*) Resistance predictions and scored mutations for ETR and RPV were performed with rules-based drug-resistance interpretation models by HIV-GRADE (<http://www.hiv-grade.de>)

## IV. Interpretation

|                  |             |                |
|------------------|-------------|----------------|
| Patient:         | Birth date: | Sampling date: |
| Current therapy: | Viral load: |                |

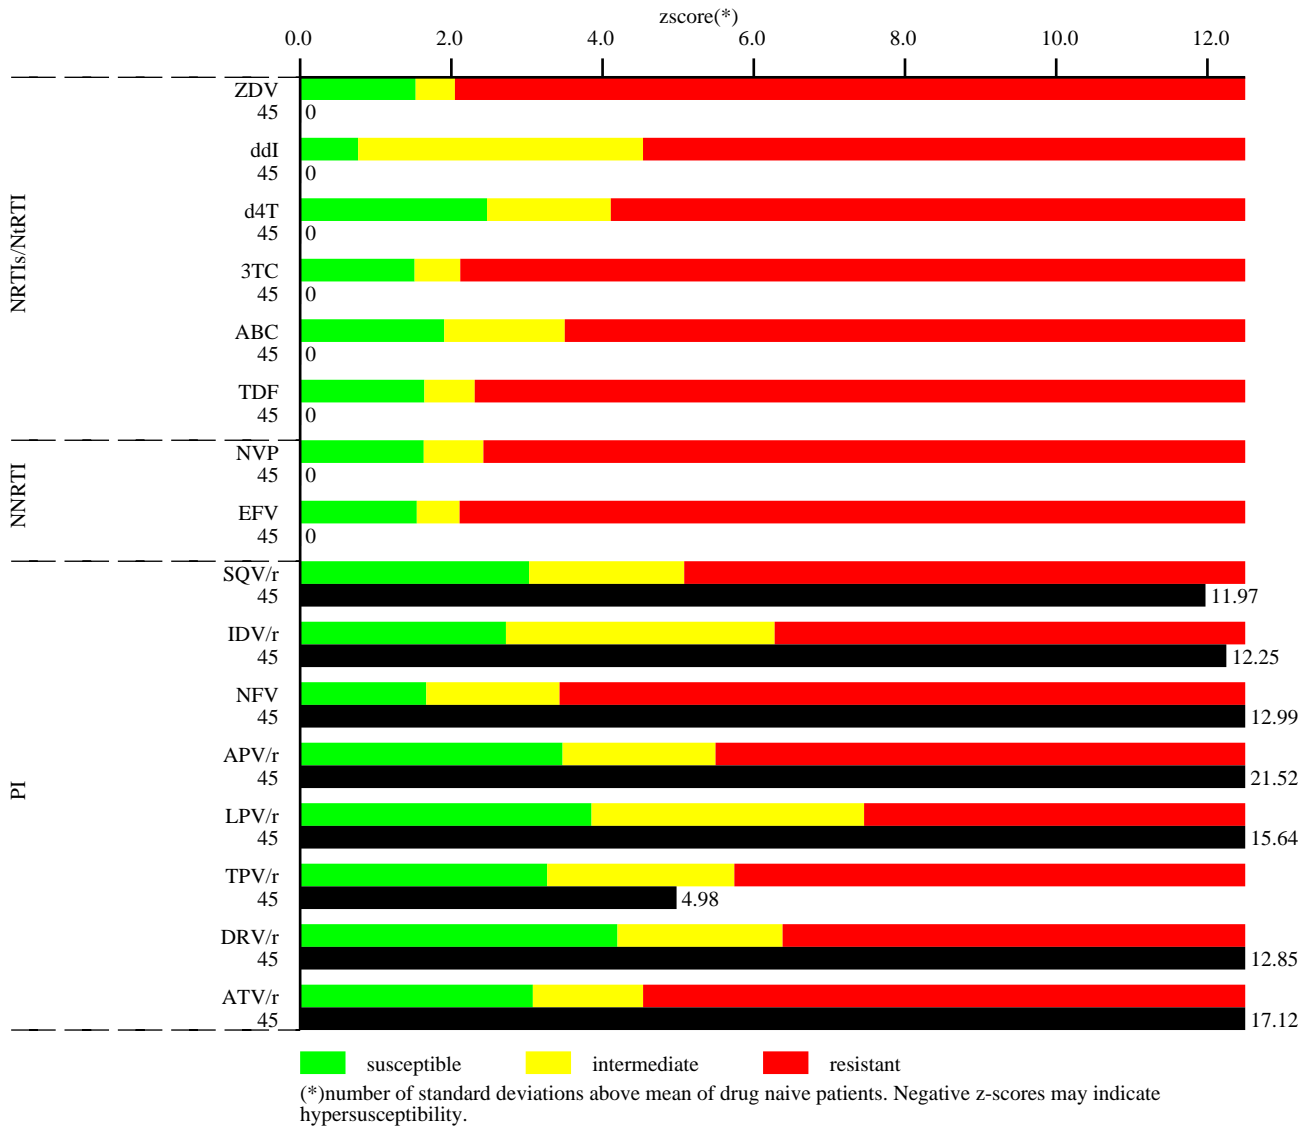

NRTIs/NtRTI:

NNRTIs:

PIs:

Previous genotypes:

date

signature
