# Supplementary material for: A Computational Approach for the Prediction of HIV Resistance Based on Amino Acid and Nucleotide Descriptors
Source: MDPI journal article supplement (doi:10.3390/molecules23112751), 2018-10-24
Supplement: s1 [file s1]

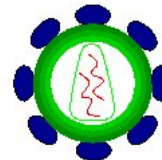

## phenotype prediction from genotype (version 3.4)

### I. General information

|                  |                              |
|------------------|------------------------------|
| Patient:         | Study Id:                    |
| Birth date:      | Viral load:                  |
| Sample received: | Sample collected:            |
| Sample ID: 27    | Predicted subtype: B (100%)  |
| Sample type:     | Report date: October 6, 2018 |
| Physician:       | Reported by:                 |

### II. Substitutions (relative to the reference strain HXB2)

|                        |                                                                                                           |
|------------------------|-----------------------------------------------------------------------------------------------------------|
| Protease:              | V3I, L10F, I13V, K20I, L24I, M36I, S37N, M46I, I54V, D60E, L63P, I64V, I66V, A71T, I72T, G73C, I84V, T91S |
| Reverse transcriptase: |                                                                                                           |

### III. Phenotype prediction

| Drug      | Resistance Factor RF (*) | z-score | Scored Positions (**)                                                                          |
|-----------|--------------------------|---------|------------------------------------------------------------------------------------------------|
| ZDV       | 0                        | 0       |                                                                                                |
| ddI       | 0                        | 0       |                                                                                                |
| d4T       | 0                        | 0       |                                                                                                |
| 3TC       | 0                        | 0       |                                                                                                |
| ABC       | 0                        | 0       |                                                                                                |
| TDF       | 0                        | 0       |                                                                                                |
| NVP       | 0                        | 0       |                                                                                                |
| EFV       | 0                        | 0       |                                                                                                |
| ETR (***) | Susceptible              |         |                                                                                                |
| RPV (***) | Susceptible              |         |                                                                                                |
| SQV       | 46.656                   | 11.028  | 48G <u>84V</u> 90L 11V 74T 88N 53F 95C 26T 1P 80T 34E 47I 97L 78G                              |
| IDV       | 107.585                  | 12.12   | 82V 88N 29D 1P <u>84V</u> 71T 21E 65E <u>46I</u> 24I 11V 85I 30D 90L 78G                       |
| NFV       | 88.356                   | 9.988   | 88N 30D <u>84V</u> 82V 97L 68G 90L <u>46I</u> 31T 75V 74T 5L 2Q 1P 29D                         |
| APV       | 29.255                   | 10.33   | 76L 50I <u>84V</u> 32V <u>46I</u> 85I <u>10F</u> 22A <u>63P</u> 1P 47I 82V 97L 45K 21E         |
| LPV       | 66.308                   | 12.268  | 82V 50I <u>46I</u> 54V <u>84V</u> 76L 22A <u>10F</u> 7Q <u>63P</u> 25D 47I 92Q 90L 2Q          |
| TPV       | 2.839                    | 2.237   | 69H <u>46I</u> <u>48G</u> <u>84V</u> 33L 47I <u>91S</u> 15I 90L 82V 74T <u>24I</u> 88N 58Q 19L |
| DRV       | 18.124                   | 7.599   | 47I <u>84V</u> 33L 76L 74T 43K 65E <u>10F</u> 48G <u>72T</u> 93I 15I 7Q 8R 16G                 |
| ATV       | 54.029                   | 11.704  | 48G <u>84V</u> 82V <u>71T</u> 4T 88N 90L 7Q 76L 45K 32V <u>46I</u> 53F 41R 2Q                  |

(\*) based on LIBSVM, Copyright (c) 2000, Chih-Chung Chang and Chih-Jen Lin

(\*\*) Positions are ordered according to their impact on the phenotype prediction. Differences with respect to HXB2 are underlined. Positions shown in red and in green contribute to an increase or decrease in resistance, respectively. At most 15 positions are shown for each drug.

(\*\*\*) Resistance predictions and scored mutations for ETR and RPV were performed with rules-based drug-resistance interpretation models by HIV-GRADE (<http://www.hiv-grade.de>)

## IV. Interpretation

|                  |             |                |
|------------------|-------------|----------------|
| Patient:         | Birth date: | Sampling date: |
| Current therapy: | Viral load: |                |

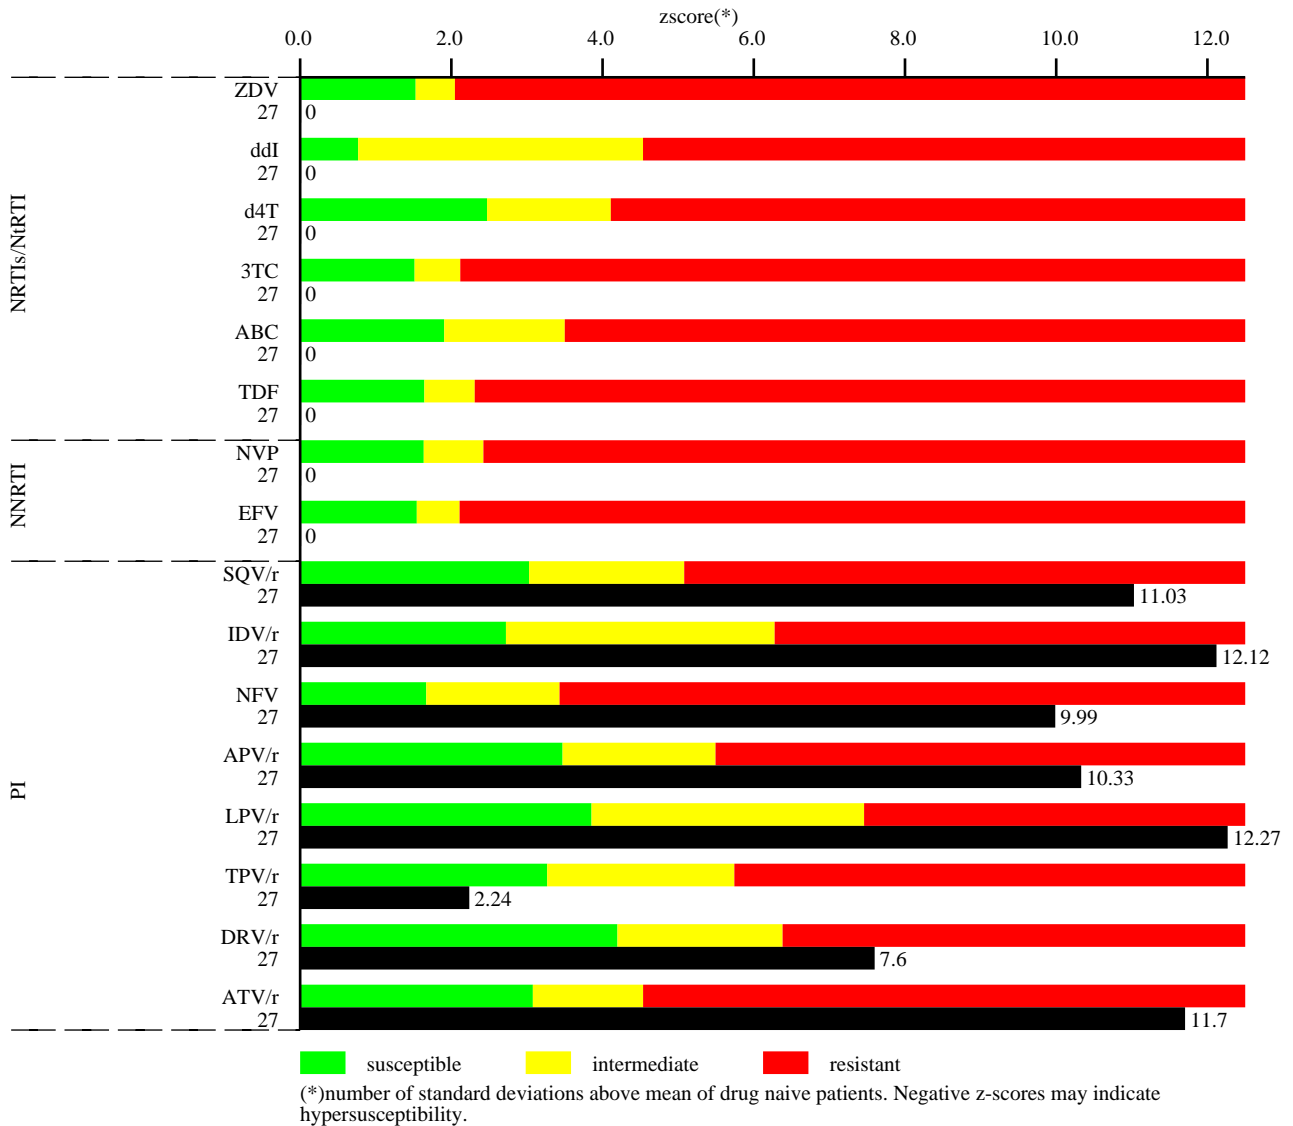

NRTIs/NtRTI:

NNRTIs:

PIs:

Previous genotypes:

date

signature
