# Supplementary material for: A Computational Approach for the Prediction of HIV Resistance Based on Amino Acid and Nucleotide Descriptors
Source: MDPI journal article supplement (doi:10.3390/molecules23112751), 2018-10-24
Supplement: s1 [file s1]

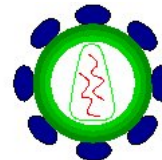

## phenotype prediction from genotype (version 3.4)

### I. General information

|                  |                              |
|------------------|------------------------------|
| Patient:         | Study Id:                    |
| Birth date:      | Viral load:                  |
| Sample received: | Sample collected:            |
| Sample ID: 46    | Predicted subtype: B (100%)  |
| Sample type:     | Report date: October 6, 2018 |
| Physician:       | Reported by:                 |

### II. Substitutions (relative to the reference strain HXB2)

|                        |                                                                                               |
|------------------------|-----------------------------------------------------------------------------------------------|
| Protease:              | V3I, L10F, I15V, S37N, R41K, M46I, K55R, I62I/V, L63P, A71T, G73G/S, V82T, I84V, I85V, L89L/M |
| Reverse transcriptase: |                                                                                               |

### III. Phenotype prediction

| Drug      | Resistance Factor RF (*) | z-score | Scored Positions (**)                                                                         |
|-----------|--------------------------|---------|-----------------------------------------------------------------------------------------------|
| ZDV       | 0                        | 0       |                                                                                               |
| ddI       | 0                        | 0       |                                                                                               |
| d4T       | 0                        | 0       |                                                                                               |
| 3TC       | 0                        | 0       |                                                                                               |
| ABC       | 0                        | 0       |                                                                                               |
| TDF       | 0                        | 0       |                                                                                               |
| NVP       | 0                        | 0       |                                                                                               |
| EFV       | 0                        | 0       |                                                                                               |
| ETR (***) | Susceptible              |         |                                                                                               |
| RPV (***) | Susceptible              |         |                                                                                               |
| SQV       | 22.18                    | 8.866   | 48G <u>84V</u> 90L 54I 11V 74T 88N 53F 95C 26T 1P 80T 34E 47I 97L                             |
| IDV       | 40.471                   | 9.475   | 54I 88N 29D 1P <u>84V</u> 71T 21E 65E <u>46I</u> 11V 30D 90L <u>73S</u> 78G 98N               |
| NFV       | 13.584                   | 5.578   | 88N 54I 30D <u>84V</u> 97L 20K 68G 90L 36M <u>46I</u> 31T 75V 74T 5L 2Q                       |
| APV       | 11.546                   | 7.389   | 54I 76L 50I <u>84V</u> 32V <u>46I</u> 82T <u>10F</u> 22A <u>63P</u> 1P 47I 13I <u>97L</u> 45K |
| LPV       | 30.105                   | 9.982   | 54I 50I <u>46I</u> <u>84V</u> 76L 22A <u>10F</u> 7Q <u>63P</u> 24L 20K 25D 47I 92Q 90L        |
| TPV       | 2.978                    | 2.341   | 69H <u>46I</u> 48G <u>84V</u> 33L 54I <u>82T</u> 47I 72I 91T 20K <u>15V</u> 90L 74T 88N       |
| DRV       | 10.668                   | 6.173   | 47I <u>84V</u> 54I 33L 76L 74T 43K 36M 65E <u>10F</u> 48G 93I <u>85V</u> 7Q <u>62V</u>        |
| ATV       | 11.989                   | 7.047   | 54I 48G <u>84V</u> <u>71T</u> 4T 88N 90L 7Q <u>73S</u> 36M 20K 24L <u>76L</u> 45K 32V         |

(\*) based on LIBSVM, Copyright (c) 2000, Chih-Chung Chang and Chih-Jen Lin

(\*\*) Positions are ordered according to their impact on the phenotype prediction. Differences with respect to HXB2 are underlined. Positions shown in red and in green contribute to an increase or decrease in resistance, respectively. At most 15 positions are shown for each drug.

(\*\*\*) Resistance predictions and scored mutations for ETR and RPV were performed with rules-based drug-resistance interpretation models by HIV-GRADE (<http://www.hiv-grade.de>)

## IV. Interpretation

|                  |             |                |
|------------------|-------------|----------------|
| Patient:         | Birth date: | Sampling date: |
| Current therapy: | Viral load: |                |

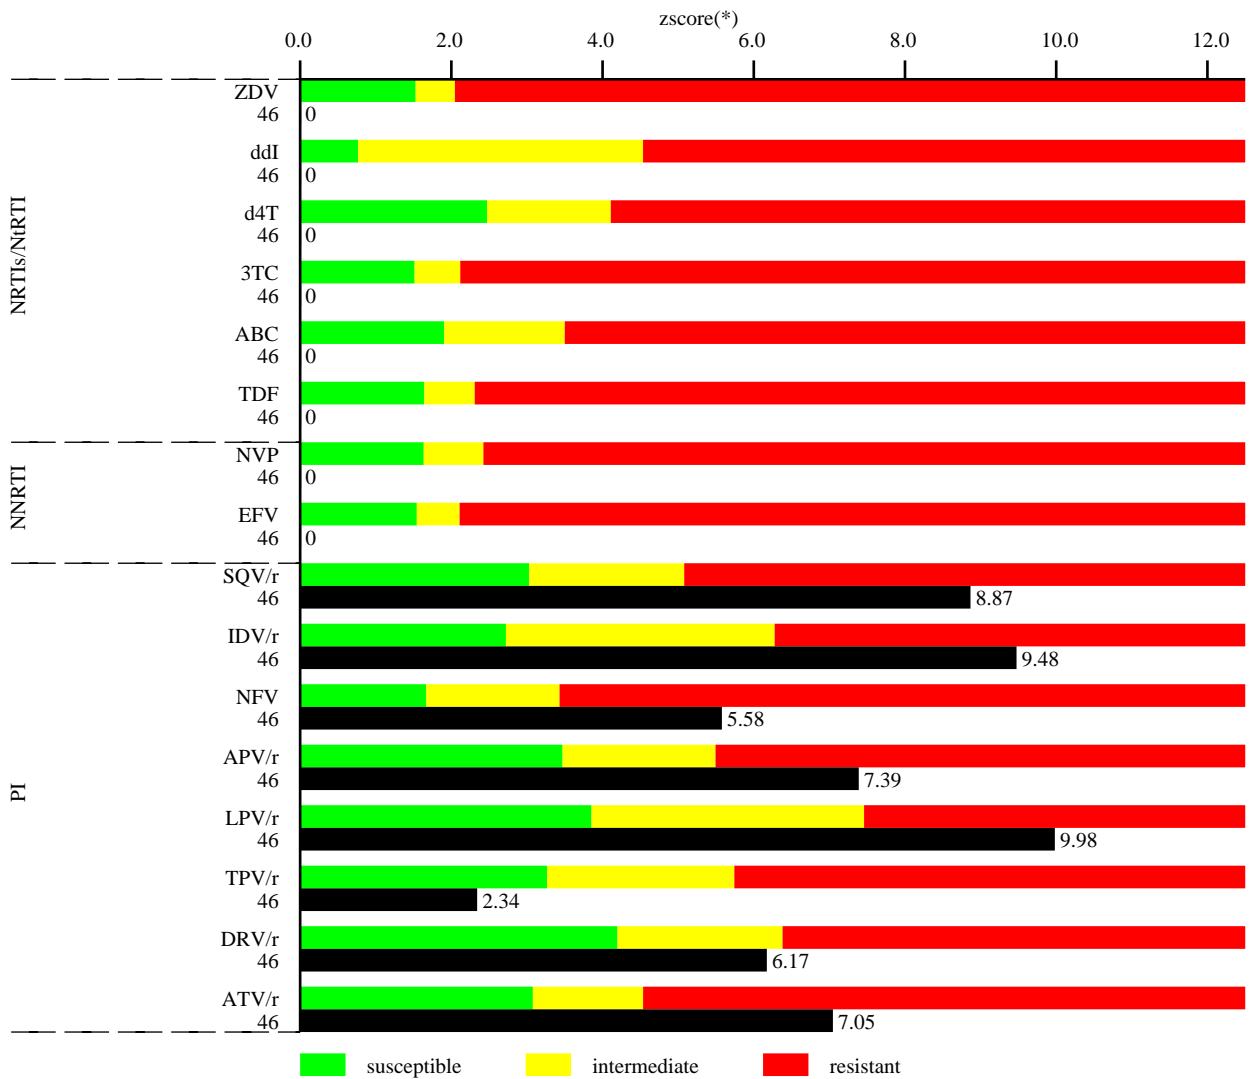

NRTIs/NtRTI:

NNRTIs:

PIs:

Previous genotypes:

date

signature
