# Supplementary material for: A Computational Approach for the Prediction of HIV Resistance Based on Amino Acid and Nucleotide Descriptors
Source: MDPI journal article supplement (doi:10.3390/molecules23112751), 2018-10-24
Supplement: s1 [file s1]

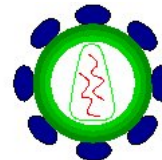

## phenotype prediction from genotype (version 3.4)

### I. General information

|                  |                              |
|------------------|------------------------------|
| Patient:         | Study Id:                    |
| Birth date:      | Viral load:                  |
| Sample received: | Sample collected:            |
| Sample ID: 8     | Predicted subtype: B (100%)  |
| Sample type:     | Report date: October 6, 2018 |
| Physician:       | Reported by:                 |

### II. Substitutions

(relative to the reference strain HXB2)

|                        |                                                                                                                                              |
|------------------------|----------------------------------------------------------------------------------------------------------------------------------------------|
| Protease:              | L10I/V, I13V, K20R, L24F, L33F, E35D, M36I, S37N, K43Q, K45R, M46L/M, I54V, K55R, R57K, Q61N, I62V, L63P, A71I, G73S, V82A, I85L, L90M, I93L |
| Reverse transcriptase: |                                                                                                                                              |

### III. Phenotype prediction

| Drug      | Resistance Factor RF (*) | z-score | Scored Positions (**)                                                                                        |
|-----------|--------------------------|---------|--------------------------------------------------------------------------------------------------------------|
| ZDV       | 0                        | 0       |                                                                                                              |
| ddI       | 0                        | 0       |                                                                                                              |
| d4T       | 0                        | 0       |                                                                                                              |
| 3TC       | 0                        | 0       |                                                                                                              |
| ABC       | 0                        | 0       |                                                                                                              |
| TDF       | 0                        | 0       |                                                                                                              |
| NVP       | 0                        | 0       |                                                                                                              |
| EFV       | 0                        | 0       |                                                                                                              |
| ETR (***) | Susceptible              |         |                                                                                                              |
| RPV (***) | Susceptible              |         |                                                                                                              |
| SQV       | 80.952                   | 12.631  | 48G 84I 11V 74T 88N <u>90M</u> 53F 95C 26T 80T 34E 47I 97L <u>73S</u> 78G                                    |
| IDV       | 391.344                  | 15.613  | 88N <u>90M</u> 29D 21E 65E 84I 11V <u>10I</u> 30D <u>73S</u> 78G 98N 76L 48G <u>24F</u>                      |
| NFV       | 326.348                  | 13.064  | 88N 30D <u>90M</u> 97L 68G 31T 75V 74T 84I 5L 29D <u>55R</u> 48G <u>71I</u> 16G                              |
| APV       | 99.173                   | 14.194  | <u>33F</u> 76L 50I 84I 32V 22A <u>63P</u> 47I <u>90M</u> 97L <u>10I</u> 46L 21E 29D 65E                      |
| LPV       | 152.672                  | 14.682  | 84I 50I <u>54V</u> <u>33F</u> 76L 22A 7Q <u>63P</u> 25D <u>82A</u> 47I 92Q 48G 74T <u>61N</u>                |
| TPV       | 6.446                    | 4.015   | <u>69H</u> <u>82A</u> 48G 84I <u>90M</u> 47I 72I 15I <u>91T</u> <u>73S</u> 74T <u>46M</u> <u>10V</u> 88N 58Q |
| DRV       | 8.674                    | 5.616   | 47I <u>33F</u> 84I 76L 74T 65E <u>93L</u> 48G <u>82A</u> 15I 7Q <u>62V</u> 8R 16G                            |
| ATV       | 208.135                  | 15.877  | 48G 84I <u>90M</u> <u>82A</u> 4T <u>33F</u> <u>46L</u> 88N 7Q <u>73S</u> 76L 32V <u>93L</u> 53F 41R          |

(\*) based on LIBSVM, Copyright (c) 2000, Chih-Chung Chang and Chih-Jen Lin

(\*\*) Positions are ordered according to their impact on the phenotype prediction. Differences with respect to HXB2 are underlined. Positions shown in red and in green contribute to an increase or decrease in resistance, respectively. At most 15 positions are shown for each drug.

(\*\*\*) Resistance predictions and scored mutations for ETR and RPV were performed with rules-based drug-resistance interpretation models by HIV-GRADE (<http://www.hiv-grade.de>)

## IV. Interpretation

|                  |             |                |
|------------------|-------------|----------------|
| Patient:         | Birth date: | Sampling date: |
| Current therapy: | Viral load: |                |

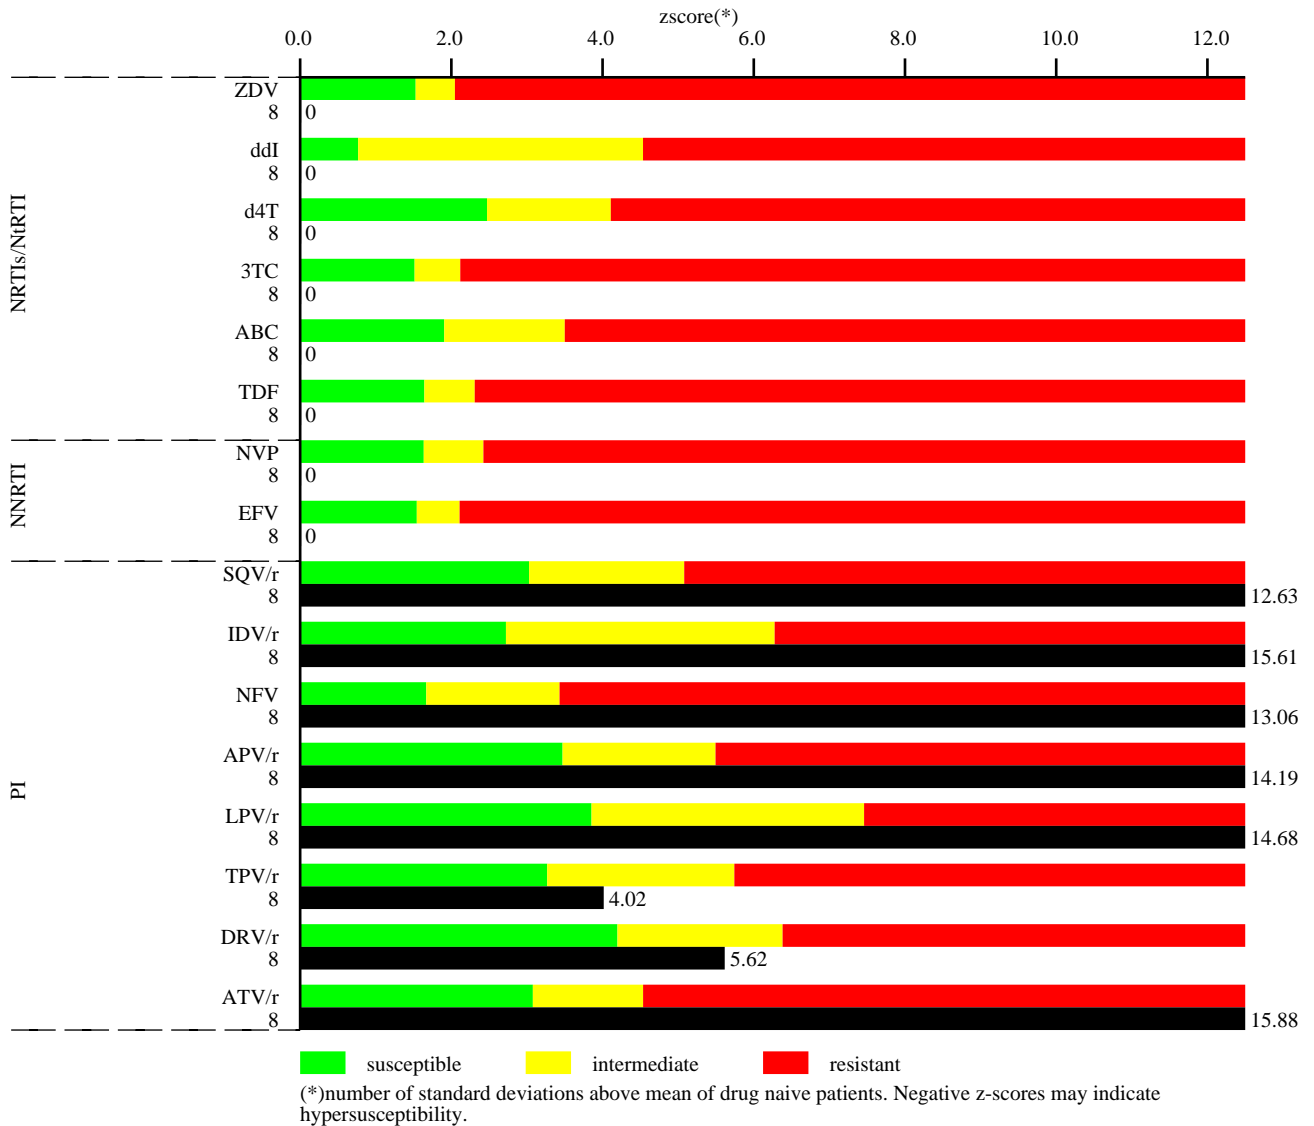

NRTIs/NtRTI:

NNRTIs:

PIs:

Previous genotypes:

date

signature
